# Supplementary material
Source: PubMed Central journal article supplement (PMC2803633)
Supplement: NIHMS164418-supplement-Supporting_Information.pdf [file NIHMS164418-supplement-Supporting_Information.pdf]

## dNTP Competition

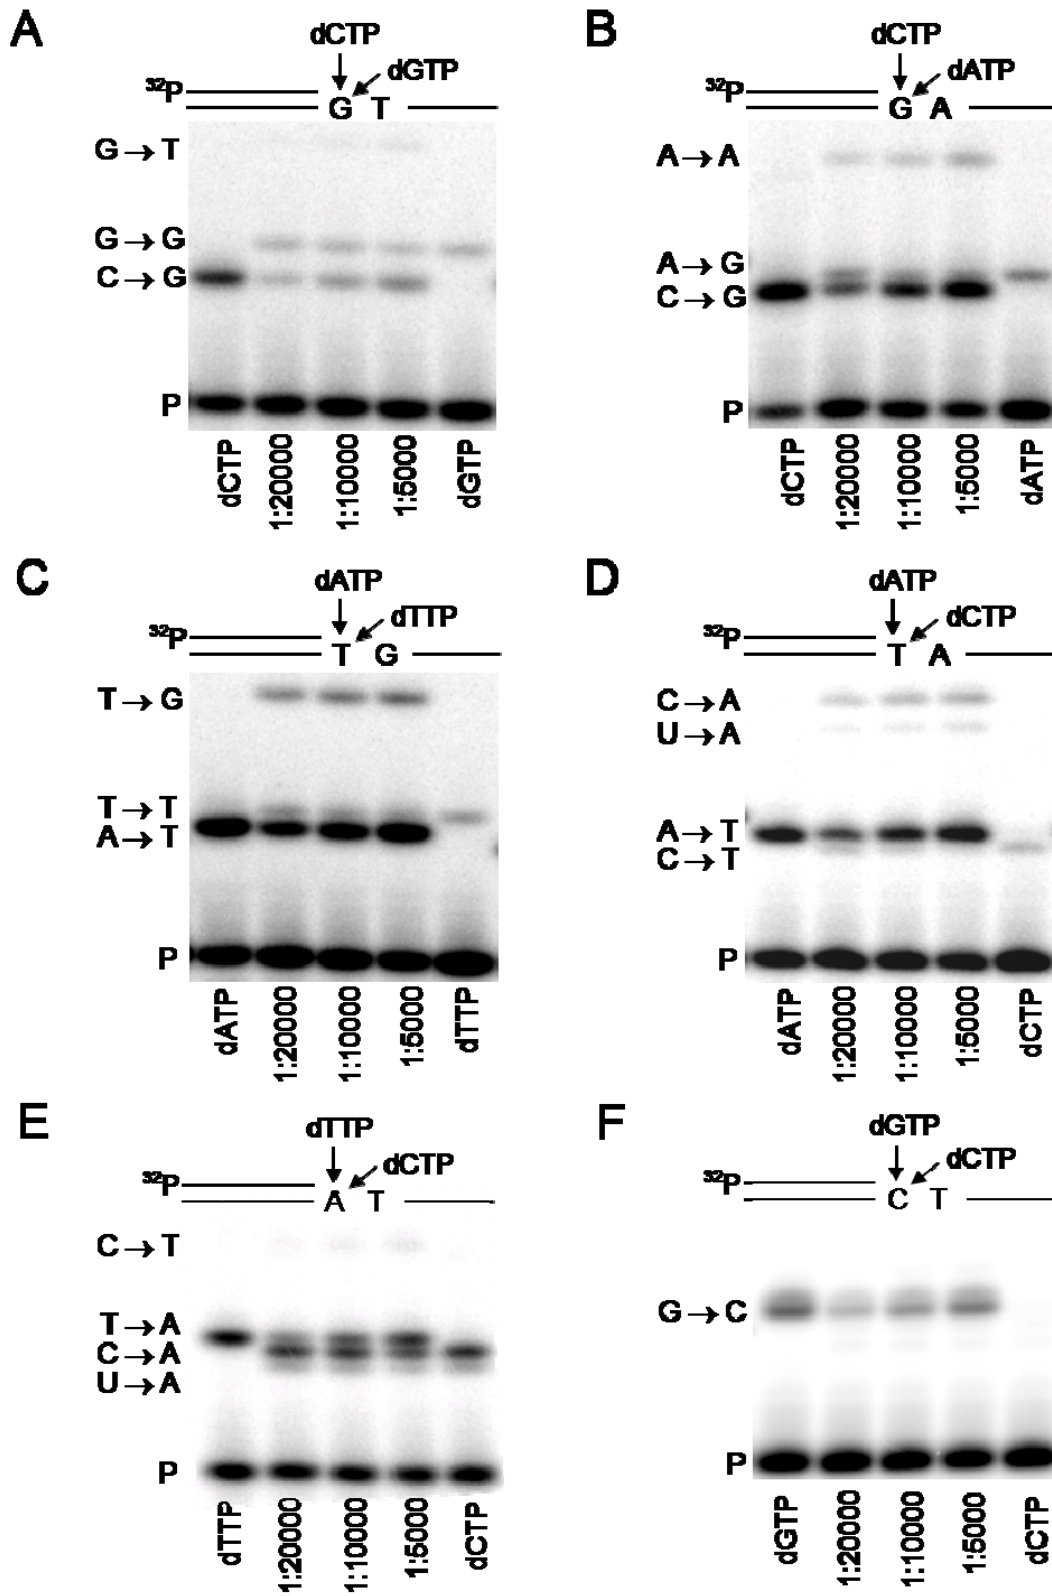

Supporting Information, Figure 1S: Additional data obtained by direct competition measurement of DNA polymerase fidelity. Radiolabeled primer and extended primer bands are shown separated by denaturing gel electrophoresis for a wrong dNTP competing with the right dNTP for insertion at the same target site on primer-template DNA, as illustrated in the sketches above each gel. In each case (A-F), the concentration of primer-template is 50 nM and  $KF^-$  is 20 nM. The outer lanes show the bands obtained with right dNTP alone (lane 1) and wrong dNTP alone (lane 5). Inner lanes 2, 3, and 4 show the bands obtained when right and wrong dNTPs compete at ratios of  $[dRTP]:[dWTP] = 1:20000, 1:10000, \text{ and } 1:5000$ . The band corresponding to “P” is unextended primer. As described in Figure 1, each primer extension band is labeled with the corresponding nucleotide incorporated opposite the template base, e.g., right C→G or wrong G→G. Direct competition misinsertion frequencies are shown in Table 1. (A) dCTP vs. dGTP, competing for insertion opposite template G. (B) dCTP vs. dATP, competing for insertion opposite template G. (C) dATP vs. dTTP, competing for insertion opposite template T. (D) dATP vs. dCTP, competing for insertion opposite template T. Here, an additional faint band appears, denoted as U→A, likely arising from spontaneous deamination of dCTP to dUTP resulting in some U incorporation opposite template A. The C→A band results from a wrong incorporation opposite the next template base, after a right A→T incorporation. Both U→A and C→A are added to band A→T to measure total amount of DNA extended by correct incorporation of A opposite T. (E) dTTP vs. dCTP competing for insertion opposite template A. The band labeled U→A is correct incorporation of dUTP opposite A and was not included when determining the misinsertion efficiency of A/C. (F) dGTP vs. dCTP competing for insertion opposite template C. Since no band was detected for dCTP misincorporation (lanes 2-5), misinsertion efficiency for C/C was not determined.

Supporting Table 1S: Steady State and Presteady State Kinetic Parameters<sup>a</sup>

| <b>Template(N)<sup>b</sup>/dNTP</b> | <b>k<sub>cat</sub> (s<sup>-1</sup>)</b> | <b>K<sub>m</sub> (μM)</b> | <b>k<sub>pol</sub> (s<sup>-1</sup>)</b> | <b>K<sub>d</sub> (μM)</b> |
|-------------------------------------|-----------------------------------------|---------------------------|-----------------------------------------|---------------------------|
| G(T1)/C                             | 0.18 ± 0.02                             | 0.013 ± 0.001             | 65 ± 2                                  | 2.7 ± 0.6                 |
| G(T1)/G                             | 0.033 ± 0.007                           | 40 ± 2                    | 0.22 ± 0.01                             | 130 ± 6                   |
| G(T1)/T                             | 0.024 ± 0.005                           | 73 ± 7                    | 0.17 ± 0.02                             | 200 ± 69                  |
| G(T2)/C                             | 0.56 ± 0.10                             | 0.015 ± 0.004             | 24 ± 0.1                                | 1.5 ± 0.2                 |
| G(T2)/A                             | 0.0075 ± 0.0016                         | 23 ± 3                    | 0.026 ± 0.001                           | 140 ± 5                   |
| C(T7)/G                             | 0.16 ± 0.02                             | 0.019 ± 0.001             | 37 ± 3                                  | 1.2 ± 0.1                 |
| C(T7)/C                             | nd <sup>c</sup>                         | nd <sup>c</sup>           | 0.0010 ± 0.0001                         | 160 ± 54                  |
| C(T7)/A                             | 0.0020 ± 0.0001                         | 12 ± 2                    | 0.030 ± 0.001                           | 100 ± 6                   |
| C(T8)/G                             | 0.27 ± 0.04                             | 0.039 ± 0.01              | 47 ± 2                                  | 1.4 ± 0.2                 |
| C(T8)/T                             | 0.019 ± 0.005                           | 50 ± 4                    | nd <sup>c</sup>                         | nd <sup>c</sup>           |
| T(T5)/A                             | 0.18 ± 0.05                             | 0.040 ± 0.004             | 96 ± 5                                  | 4.0 ± 0.5                 |
| T(T5)/C                             | 0.0093 × 0.0017                         | 390 ± 350                 | 0.035 ± 0.004                           | 490 ± 77                  |
| T(T5)/G                             | 0.043 ± 0.009                           | 79 ± 13                   | 0.89 ± 0.04                             | 280 ± 49                  |
| T(T6)/A                             | 0.15 ± 0.03                             | 0.0094 ± 0.0012           | 50 ± 1                                  | 3.4 ± 0.3                 |
| T(T6)/T                             | 0.0019 ± 0.0002                         | 62 ± 11                   | 0.0094 ± 0.0004                         | 66 ± 14                   |
| A(T3)/T                             | 0.12 ± 0.01                             | 0.0075 ± 0.0015           | 89 ± 4                                  | 4.9 ± 1.5                 |
| A(T3)/C                             | 0.081 ± 0.003                           | 150 ± 21                  | 1.9 ± 0.03                              | 1300 ± 340                |
| A(T3)/G                             | 0.0020 ± 0.0004                         | 21 ± 5                    | 0.019 ± 0.002                           | 100 ± 25                  |
| A(T4)/T                             | 0.087 ± 0.001                           | 0.013 ± 0.001             | 85 ± 3                                  | 6.4 ± 0.6                 |
| A(T4)/A                             | 0.022 ± 0.002                           | 22 ± 1                    | 0.38 ± 0.02                             | 150 ± 18                  |

<sup>a</sup>Values are reported as the mean ± standard error of three replicates. <sup>b</sup>N denotes the template used, see MATERIALS AND METHODS. <sup>c</sup>nd-not detectable.
